# Supplementary material
Source: PubMed Central journal article supplement (PMC5949996)
Supplement: supp_RA117.000678_133513_1_supp_46566_p1rcd0.pdf [file supp_RA117.000678_133513_1_supp_46566_p1rcd0.pdf]

**Table S1. Mediator components co-immunoprecipitated with FLAG-Brd3.**

| Protein | # peptides identified |            |
|---------|-----------------------|------------|
|         | FLAG-Brd3 IP          | Control IP |
| MED1    | 12                    | 0          |
| MED4    | 9                     | 0          |
| MED6    | 4                     | 0          |
| MED8    | 3                     | 0          |
| MED10   | 3                     | 0          |
| MED12   | 5                     | 0          |
| MED13   | 3                     | 0          |
| MED14   | 14                    | 0          |
| MED16   | 5                     | 0          |
| MED17   | 8                     | 0          |
| MED20   | 3                     | 0          |
| MED21   | 2                     | 0          |
| MED22   | 3                     | 0          |
| MED23   | 16                    | 0          |
| MED26   | 7                     | 0          |
| MED27   | 6                     | 0          |
| MED30   | 3                     | 0          |

**Table S2. PAF complex components co-immunoprecipitated with FLAG-Brd3.**

| Protein | # peptides identified |            |
|---------|-----------------------|------------|
|         | FLAG-Brd3 IP          | Control IP |
| CDC73   | 23                    | 0          |
| CTR9    | 15                    | 0          |
| LEO1    | 3                     | 0          |
| PAF1    | 13                    | 0          |
| SKI8    | 10                    | 0          |

**Table S3. Transcription elongation factors co-immunoprecipitated with FLAG-Brd3.**

| Protein   | # peptides identified |            |
|-----------|-----------------------|------------|
|           | FLAG-Brd3 IP          | Control IP |
| CDK9      | 10                    | 0          |
| Elongin A | 8                     | 0          |
| Elongin B | 4                     | 0          |
| Elongin C | 2                     | 0          |
| FACT      | 3                     | 1          |

**Table S4. RNA polymerase II preinitiation complex components co-immunoprecipitated with FLAG-Brd3.**

| Protein complex   | Protein | # peptides identified |            |
|-------------------|---------|-----------------------|------------|
|                   |         | FLAG-Brd3 IP          | Control IP |
| RNA polymerase II |         |                       |            |
|                   | POLR2A  | 5                     | 0          |
|                   | POLR2C  | 3                     | 0          |
|                   | POLR2E  | 3                     | 0          |
| TFIIH             |         |                       |            |
|                   | CDK7    | 5                     | 0          |
|                   | ERCC2   | 4                     | 0          |
|                   | GTF2H1  | 5                     | 0          |
|                   | GTF2H2  | 5                     | 0          |
|                   | GTF2H3  | 4                     | 0          |
|                   | GTF2H4  | 6                     | 0          |
| TFIID             |         |                       |            |
|                   | TAF1    | 35                    | 0          |
|                   | TAF2    | 13                    | 0          |
|                   | TAF3    | 12                    | 0          |
|                   | TAF4    | 13                    | 0          |
|                   | TAF6    | 32                    | 0          |

|  |       |    |   |
|--|-------|----|---|
|  | TAF7  | 11 | 0 |
|  | TAF8  | 6  | 0 |
|  | TAF9  | 14 | 0 |
|  | TAF9B | 6  | 0 |
|  | TAF10 | 5  | 0 |
|  | TAF11 | 4  | 0 |
|  | TAF12 | 2  | 0 |
|  | TAF13 | 3  | 0 |
|  | TBP   | 4  | 0 |

**Table S5. Genes that co-immunoprecipitate specifically with Flag-Brd3 (twice as many peptides detected vs control)**

|         |         |             |          |          |
|---------|---------|-------------|----------|----------|
| CHD4    | PELP1   | LOC732272   | PAF1     | PSIP1    |
| CHD8    | USP7    | ADNP        | TAF7     | HNRNPR   |
| SMARCA4 | WHSC1L1 | ZMYND8      | BRD9     | GTF2H1   |
| PBRM1   | BRD2    | SMARCA5     | TAF4     | KPNA3    |
| TCOF1   | POLR2A  | TUBA1C      | NCL      | CBX4     |
| TAF1    | NFRKB   | EIF5B       | LYAR     | ACTR8    |
| GLTSCR1 | ARID2   | SFRS15      | PARP1    | PHF10    |
| SMARCC1 | IWSI    | NCAPD2      | ACTR5    | BRD2     |
| ATAD5   | BRD4    | RPLPO       | MED17    | MED16    |
| PRKDC   | MED12   | HSPA8       | TCEB3    | NOLC1    |
| DHX9    | SMARCA2 | TAF6        | PUF60    | YBX1     |
| SMARCC2 | RFC1    | RUVBL2      | WHSC1L1  | CHD4     |
| MED23   | RRP12   | HSPA5       | KPNA2    | SERBP1   |
| CTR9    | HTATSF1 | GTPBP4      | XRCC5    | BRD7     |
| MYBBP1A | CHD9    | WHSC1       | U2AF2    | DKC1     |
| NOLC1   | MED13   | CDC73       | GATAD2B  | ZNF148   |
| MED14   | LEO1    | RPL4        | MED26    | ERCC2    |
| TAF4    | CHD6    | XRCC6       | DDX41    | RPA1     |
| TAF2    | POLR1a  | ACTL6A      | HDAC2    | BRD9     |
| MED1    | SUPT16H | RBM39       | HMGXB4   | MTA1     |
| GTF3C1  | ZNF687  | RUVBL1      | ARRB2    | UBTF     |
| TAF3    | AGTPBP1 | KBTBD8      | SMARCE1  | CHAF1B   |
| PRPF40A | DHX37   | MTA2        | HDAC1    | RBBP5    |
| SF3B1   | IQGAP1  | GNL3        | RBBP4    | ARCN1    |
| BPTF    | RBM25   | NCL         | GATAD2A  | HSP90AB1 |
| INO80   | PRPF8   | ILF3 (NFAT) | HSP90AA1 | RSL1D1   |

|          |          |          |         |           |
|----------|----------|----------|---------|-----------|
| C14orf21 | CSNK2A1  | TAF8     | TBP     | LUC7L     |
| RPL3     | RPL3     | HSPA1A   | GATAD2a | MED4      |
| LTV1     | CSNK2A2  | RNF2     | FIBP    | PUF60     |
| CSDA     | RPLP0    | GTF2H4   | POLR1C  | HNRNPD    |
| LUC7L2   | ILF2     | MED27    | RPSAP12 | GLRX3     |
| SMARCD2  | RPL5     | LUC7L2   | BCL7A   | MKI67IP   |
| TAF3     | RFC5     | WDR18    | FBL     | NFKBIL1   |
| TOP1     | RFC2     | CDC73    | CBX4    | RBBP4     |
| STRBP    | RFC4     | HNRNPA1  | EEF1A2  | PAK1IP1   |
| TCOF1    | RPS3A    | EIF2S1   | PPP1CC  | BRD7      |
| GTF3C5   | NCL      | ACTL6A   | HMGXB4  | RPS2      |
| CTPS     | WDR61    | DRG1     | WHSC1   | RPP38     |
| CHD8     | CDK9     | CDK7     | INO80E  | LOC440577 |
| TMPO     | MBD3     | HIST1H1C | POLR2C  | TUBB1     |
| USP39    | RFC3     | DEK      | HNRNPAB | INO80B    |
| NOC4L    | EBNA1BP2 | RPS3     | WDR82   | SMARCE1   |
| CROP     | MED4     | GTF2H2   | SFRS5   | RPL3L     |
| INO80B   | RPL4     | TCEB3    | PARP1   | RPS3      |
| KPNA4    | PHF6     | ACTR1A   | U2AF1   | RPS4X     |
| PAF1     | SMARCB1  | GTF2H3   | NOLC1   | RPL7      |
| DDX3X    | UCHL5    | MNAT1    | RUVBL1  | TAF9      |
| PIP4K2A  | HSPA8    | TUBB     | BRD2    | LY6G5B    |
| HSP90AA2 | FEN1     | BCL7C    | TOP1    | RPS9      |
| FUS      | HSPA1L   | C1orf35  | MED19   | RPS6      |
| WDR48    | AHSA1    | WDR5     | BCCIP   | RPS3A     |
| EXOSC9   | NUDC     | RRS1     | SNRNP40 | NPM1      |
| BYSL     | LYAR     | EIF4A1   | HNRNPA0 | CSNK2A1   |
| POLR1E   | TAF4     | BXDC2    | EEF1A1  | RPL7A     |

|          |          |         |          |          |
|----------|----------|---------|----------|----------|
| RPL21P19 | RPS8     | EIF6    | C7orf50  | UBE2M    |
| RPS2     | RPL8     | THOC4   | MED10    | TCEB1    |
| RPL23A   | RPS7P4   | TAF10   | INO80C   | HSPA1A   |
| RPS17    | RPL9     | RPS15   | C4orf43  | WDR61    |
| RPL23    | CSNK2A2  | H1FX    | ACTB     | RPL5     |
| RPS18    | RPS24    | RPS5    | MED22    | EXOSC2   |
| RPL18A   | RPL19    | NOP16   | MED8     | EEF1A1   |
| RPL13A   | SNORA7A  | RPL27A  | POLR2E   | RUVBL1   |
| RPLP2    | RPL4     | RPL38   | MED20    | RPL37A   |
| RPLP0    | RPL27    | ZNF740  | RPS20    | INO80E   |
| RPL30    | RPL36    | PRDX6   | NCL      | GAPDH    |
| RPS13    | RPL24    | RPS23   | PSME3    | HSPA7    |
| RPL10A   | RPL13P12 | RPS10   | HNRNPK   | NPM3     |
| RPL15    | SRP14    | RPL35A  | MED30    | RPL17    |
| RPS19    | RPL6     | TAF11   | TAF4     | MED21    |
| RPS15A   | RPL28    | TUBB    | RPP30    | LLPH     |
| RPS16    | RPS14    | TUBA1C  | RPS27    | RPL7AP27 |
| RPL26L1  | TAF9B    | RPL13   | TAF13    | RPL35    |
| RPS7     | TUBA4A   | YWHAE   | RPL10AP3 | HSPA8    |
| C17orf49 | RPL31    | ILF2    | HSPA1L   | ACTL6A   |
| RPL3     | HIST1H1C | TCEB2   | NHP2     | FAU      |
| RPL22    | RPS11    | MED6    | EIF4A1   | SNRPE    |
| RPL12    | RPS25    | RPL10L  | RPS28    | RFC4     |
| TUBB2C   | RPL34    | RPL26   | RPS12    | TAF12    |
| RPL18    | RPL10P16 | RPL36AL | GAR1     | SFRS3    |



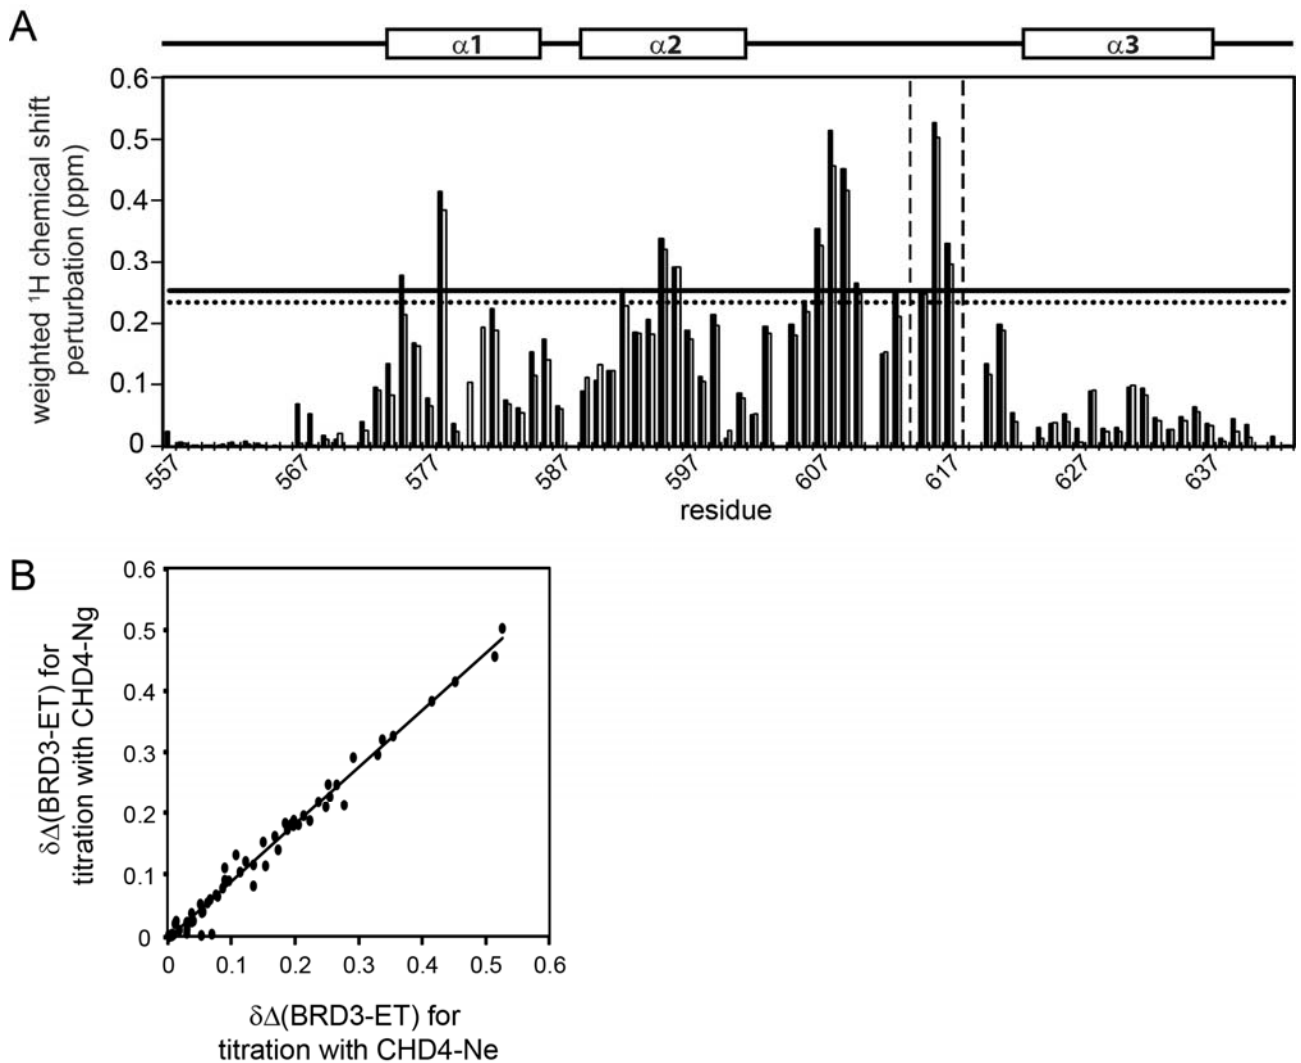

**Figure S1.** (A) Chemical shift changes induced in BRD3-ET following saturation with either CHD4-Ne (black bars) or CHD4-Ng (white bars). Horizontal solid and dashed lines indicate 1 standard deviation above the mean chemical shift change for CHD4-Ne and CHD4-Ng, respectively. Peaks that disappear by the titration endpoint are indicated by vertical dashed lines. Secondary structure of BRD3-ET is shown above the plot. (B) Correlation between the magnitudes of the BRD3-ET chemical shift perturbations induced by CHD4-Ne and CHD4-Ng.
